# Supplementary material for: Diverse Regulatory Manners and Potential Roles of lncRNAs in the Developmental Process of Asian Honey Bee (Apis cerana) Larval Guts
Source: MDPI journal article supplement (doi:10.3390/ijms242015399), 2023-10-20
Supplement: s1 [file s1]

[illegible]

**Figure S1:** ceRNA of DElnRNAs-DEmiRNAs-DEmRNAs in the Ac4 vs. Ac5 (A) and Ac5 vs. Ac6 (B) comparison group.



lncRNA miR-6001-y mRNA

A

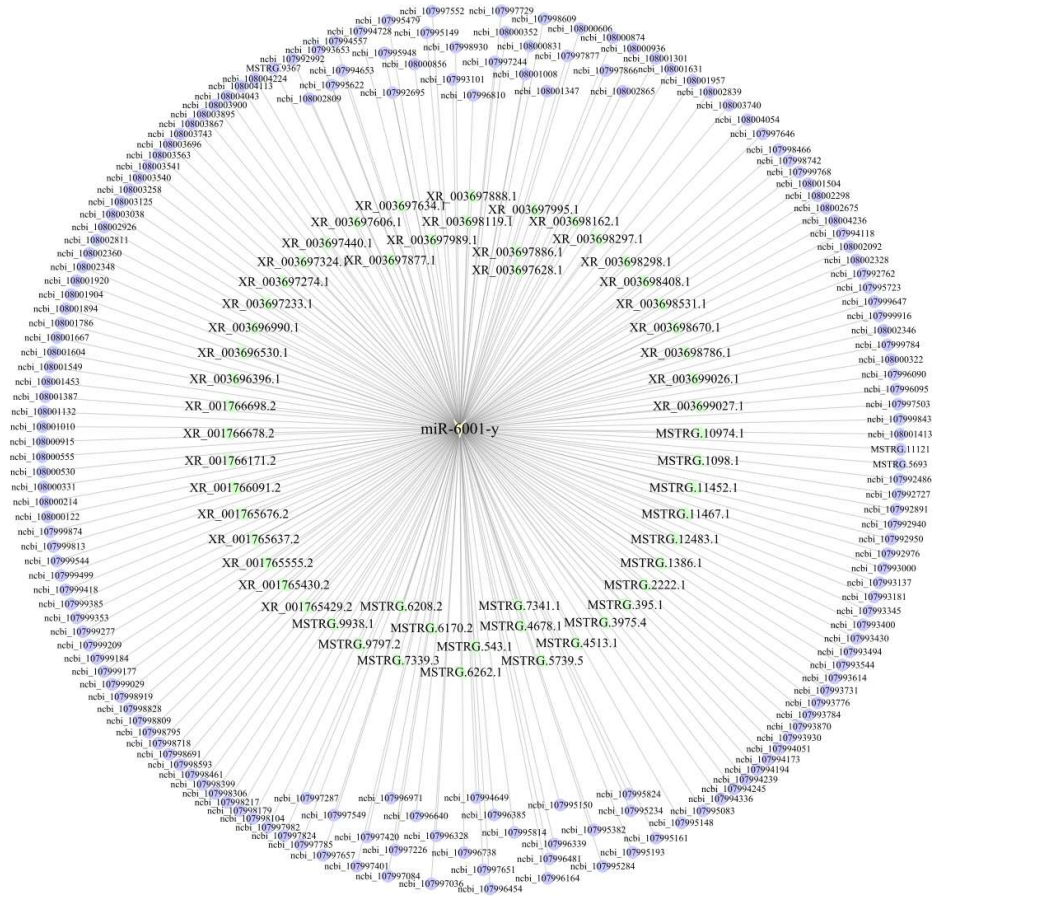

B

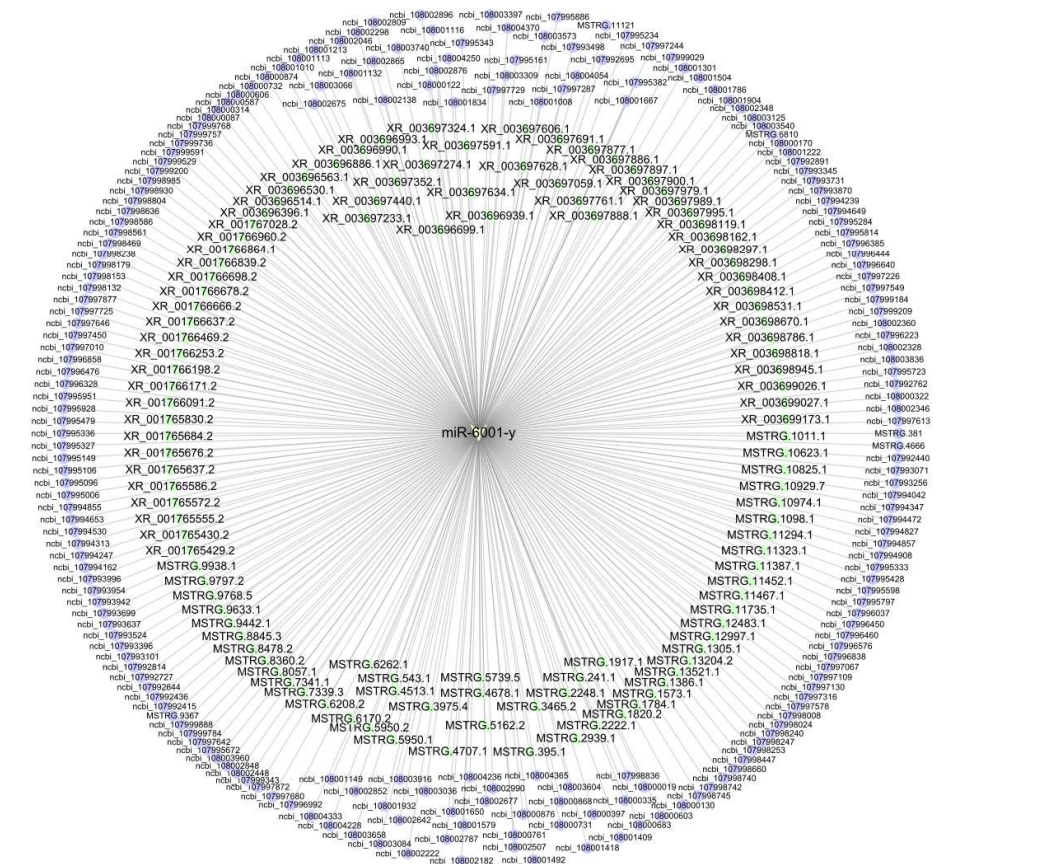

**Figure S2:** Regulatory networks of DElncRNAs-miR-6001-y-DEmRNAs in Ac4 vs. Ac5 (A) and Ac5 vs. Ac6 (B) comparison group.
